# Supplementary material
Source: bioRxiv or medRxiv preprint supplement (https://www.biorxiv.org/highwire/filestream/13859/field_highwire_adjunct_files/0/050724-1.pdf)
Supplement: Supplementary file [file 050724-1.pdf]

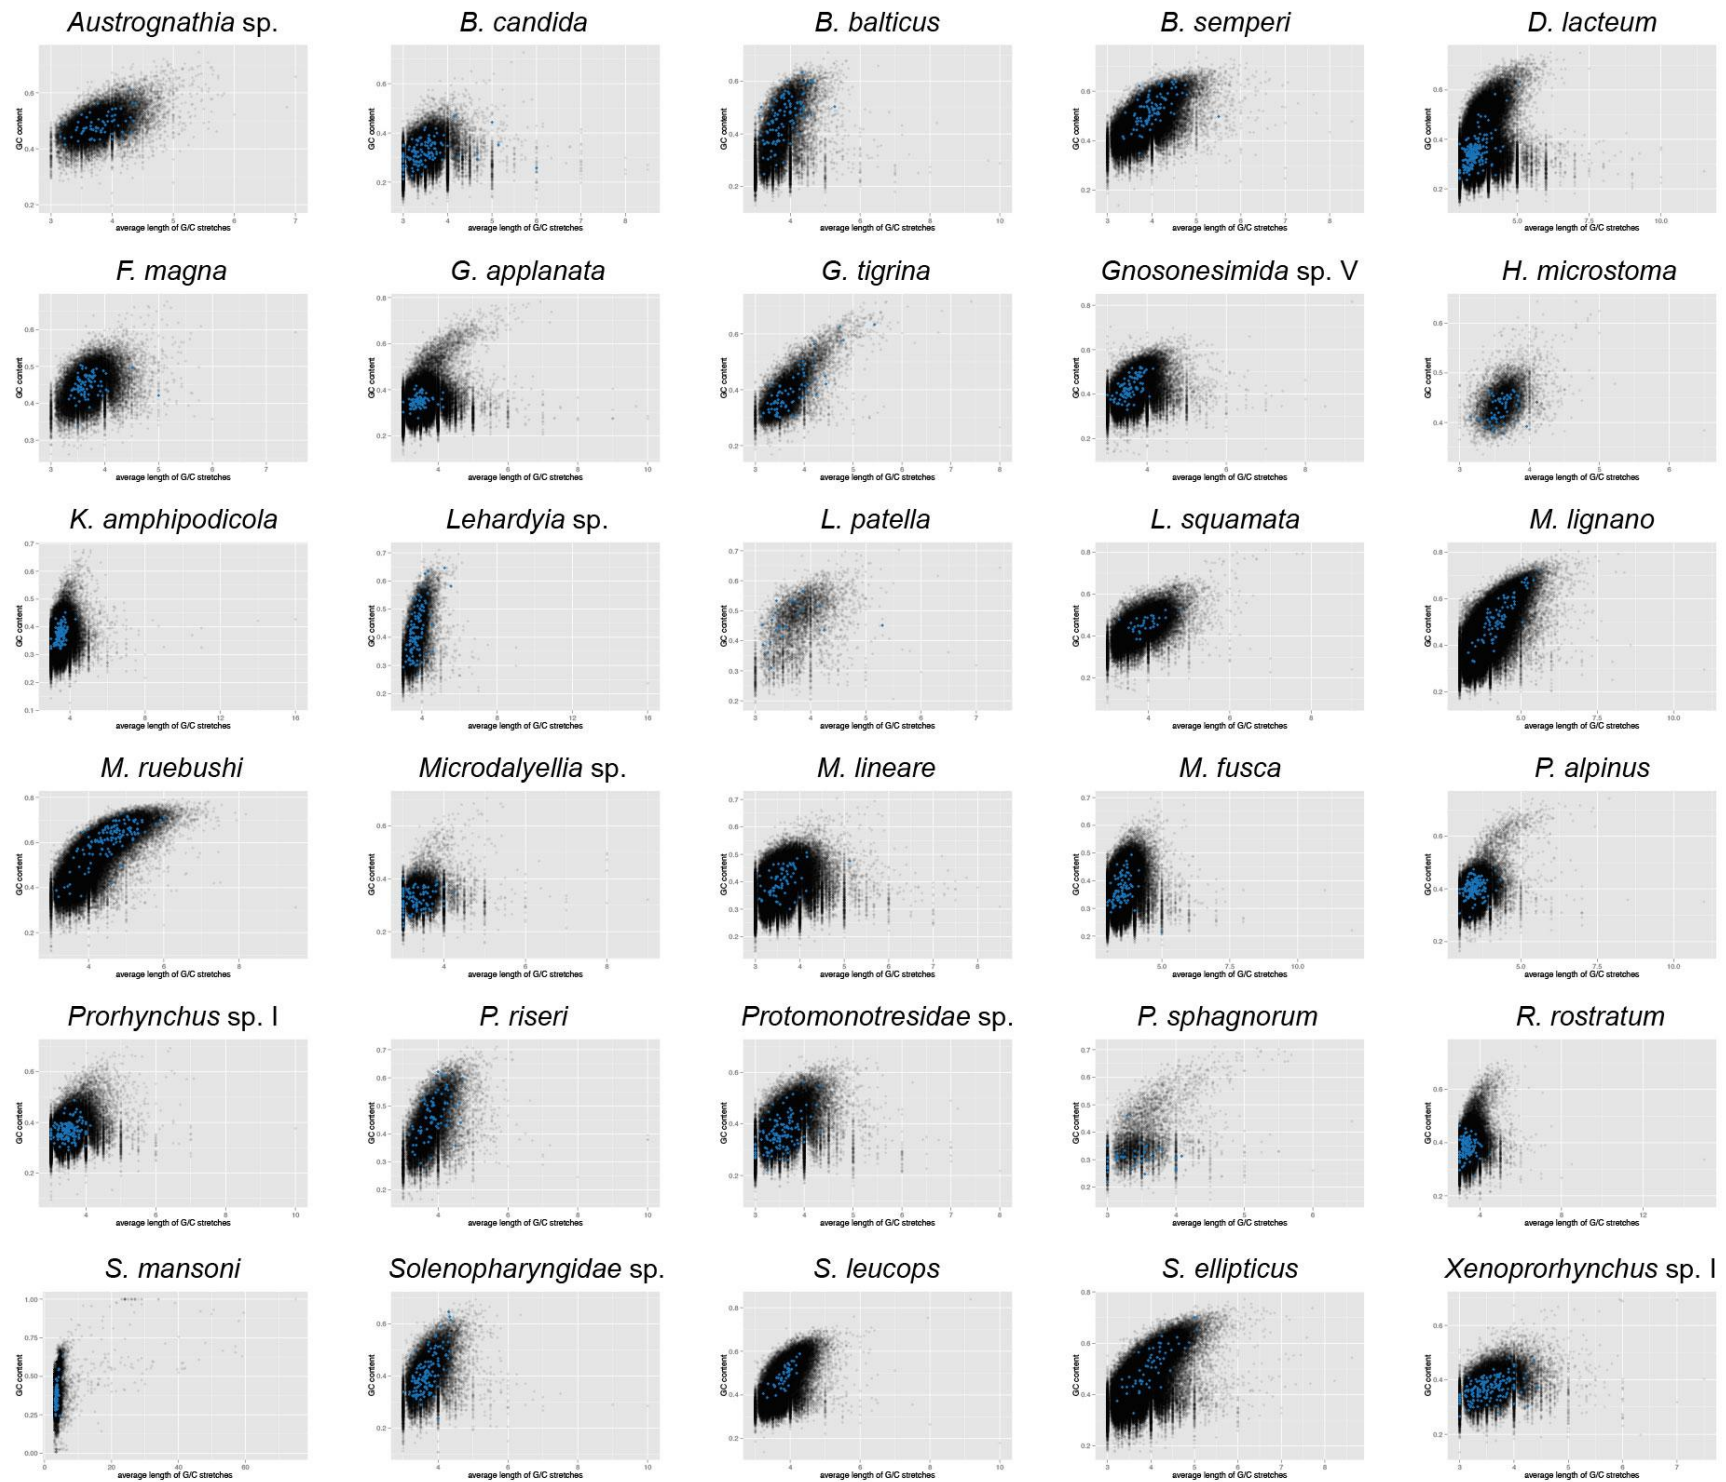

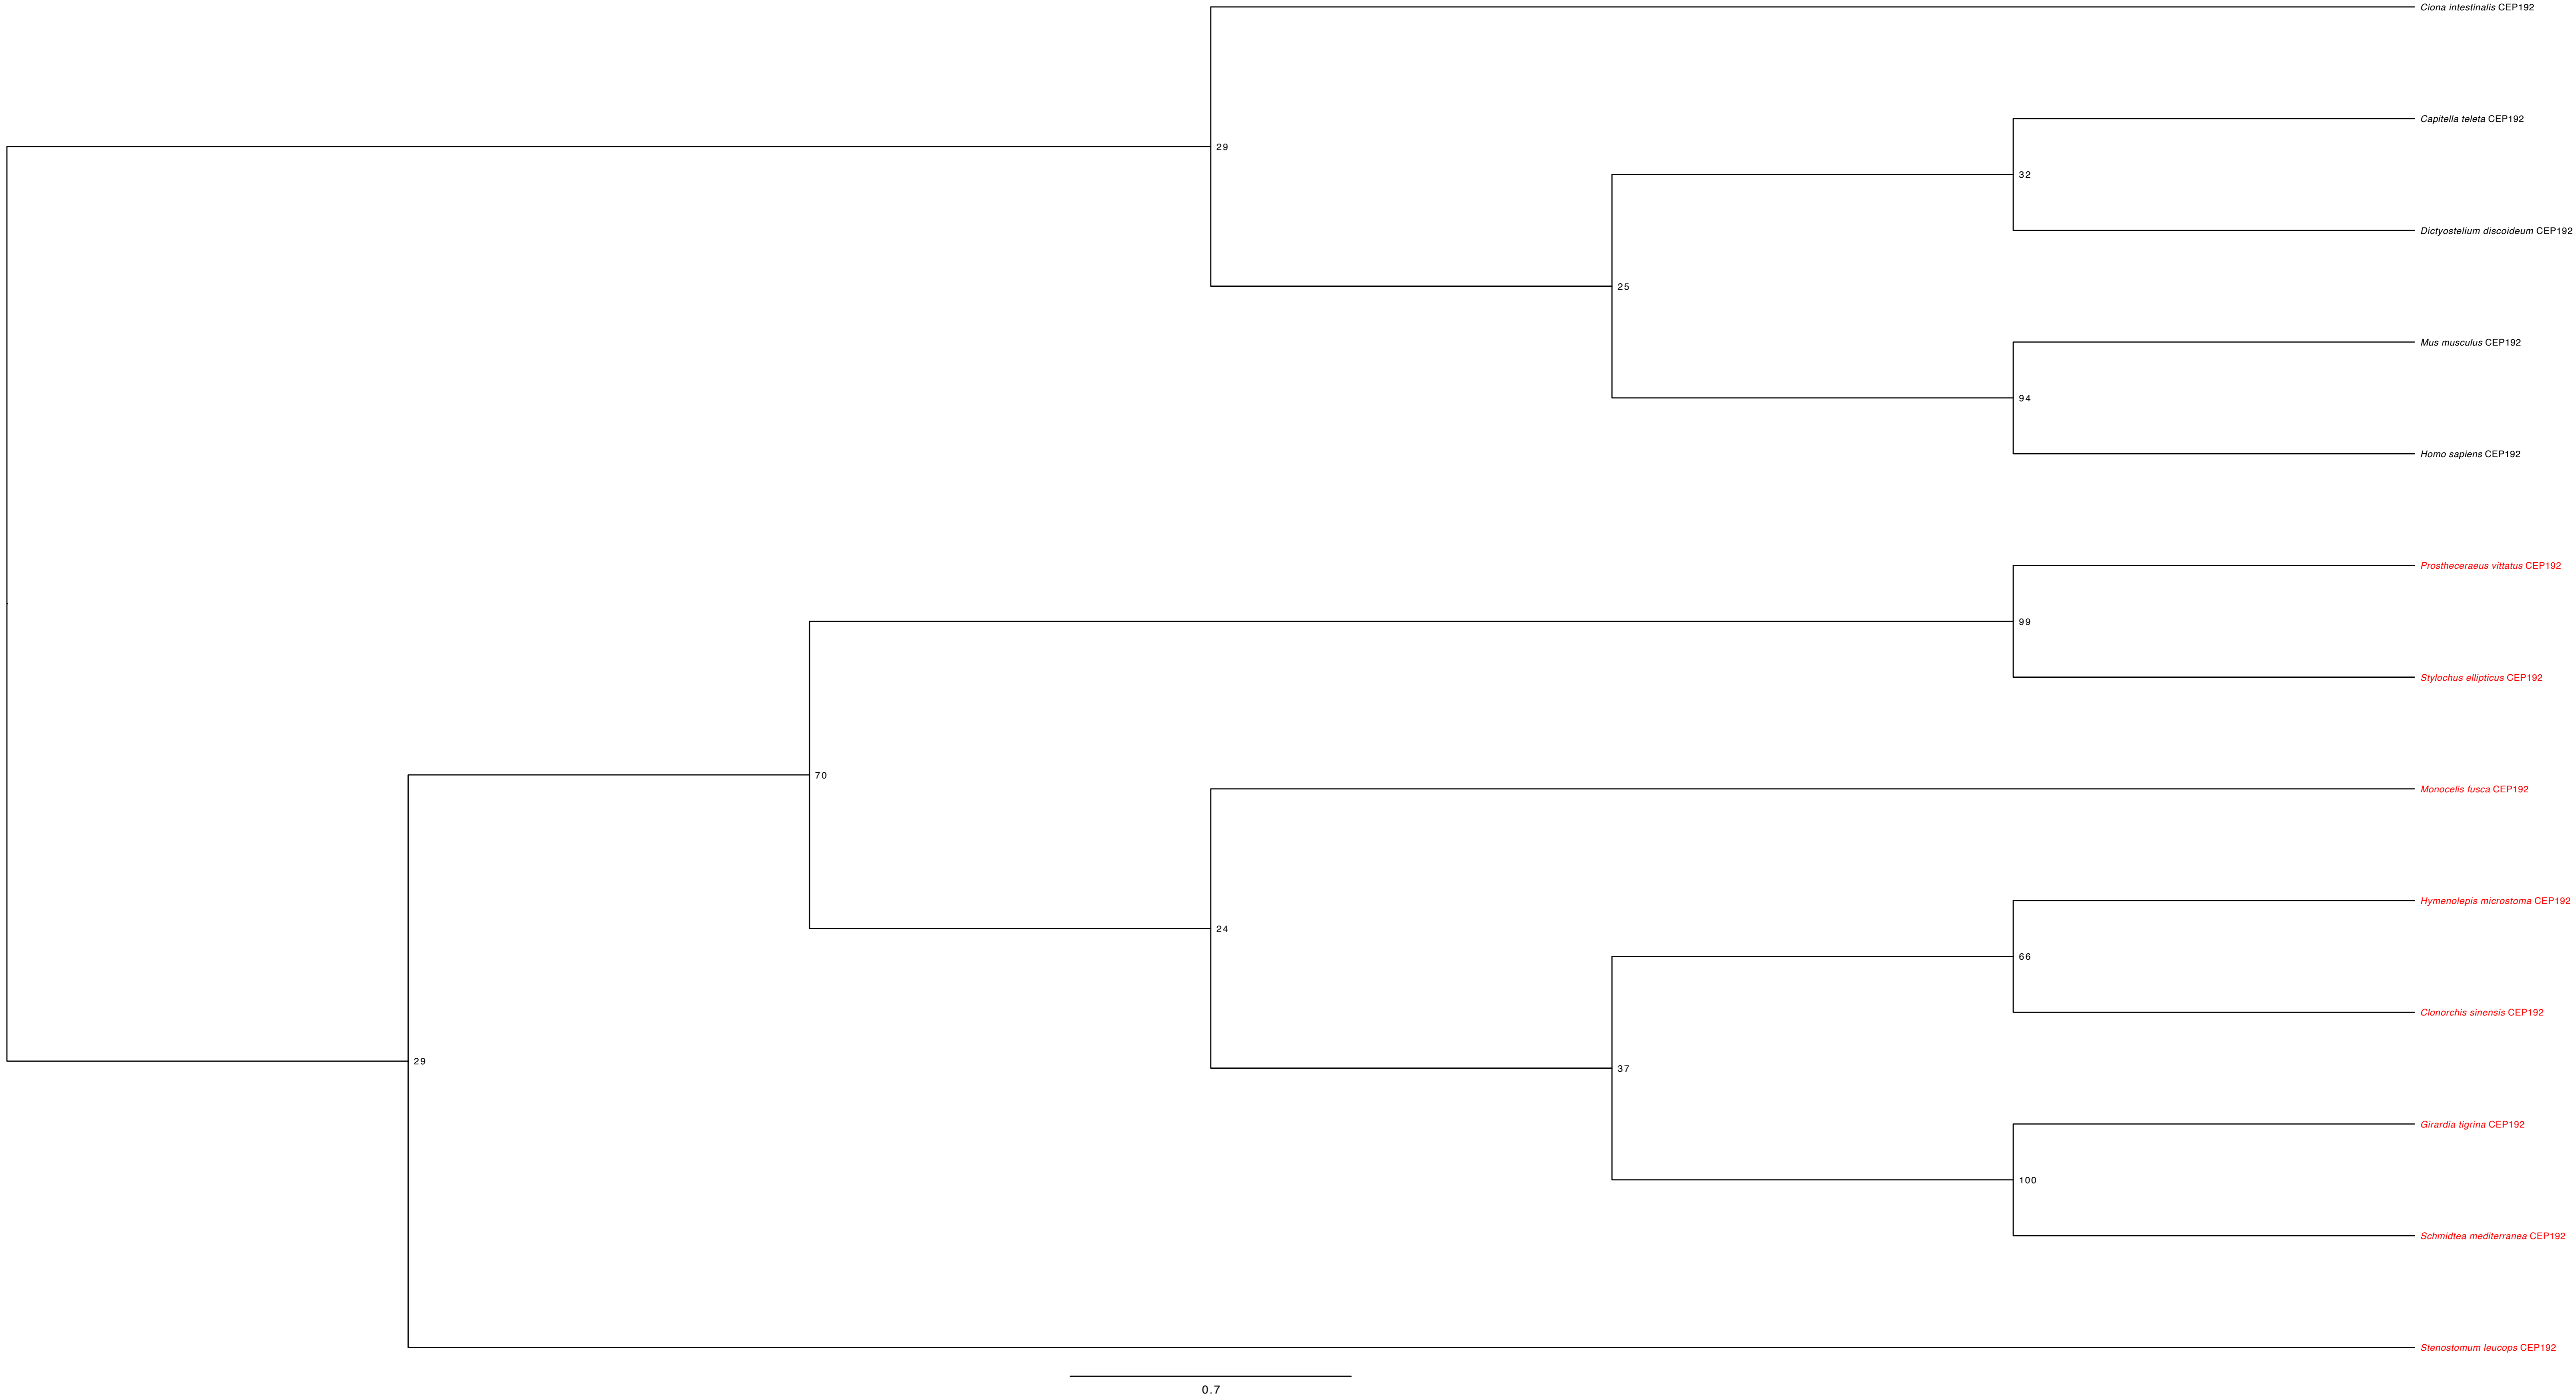

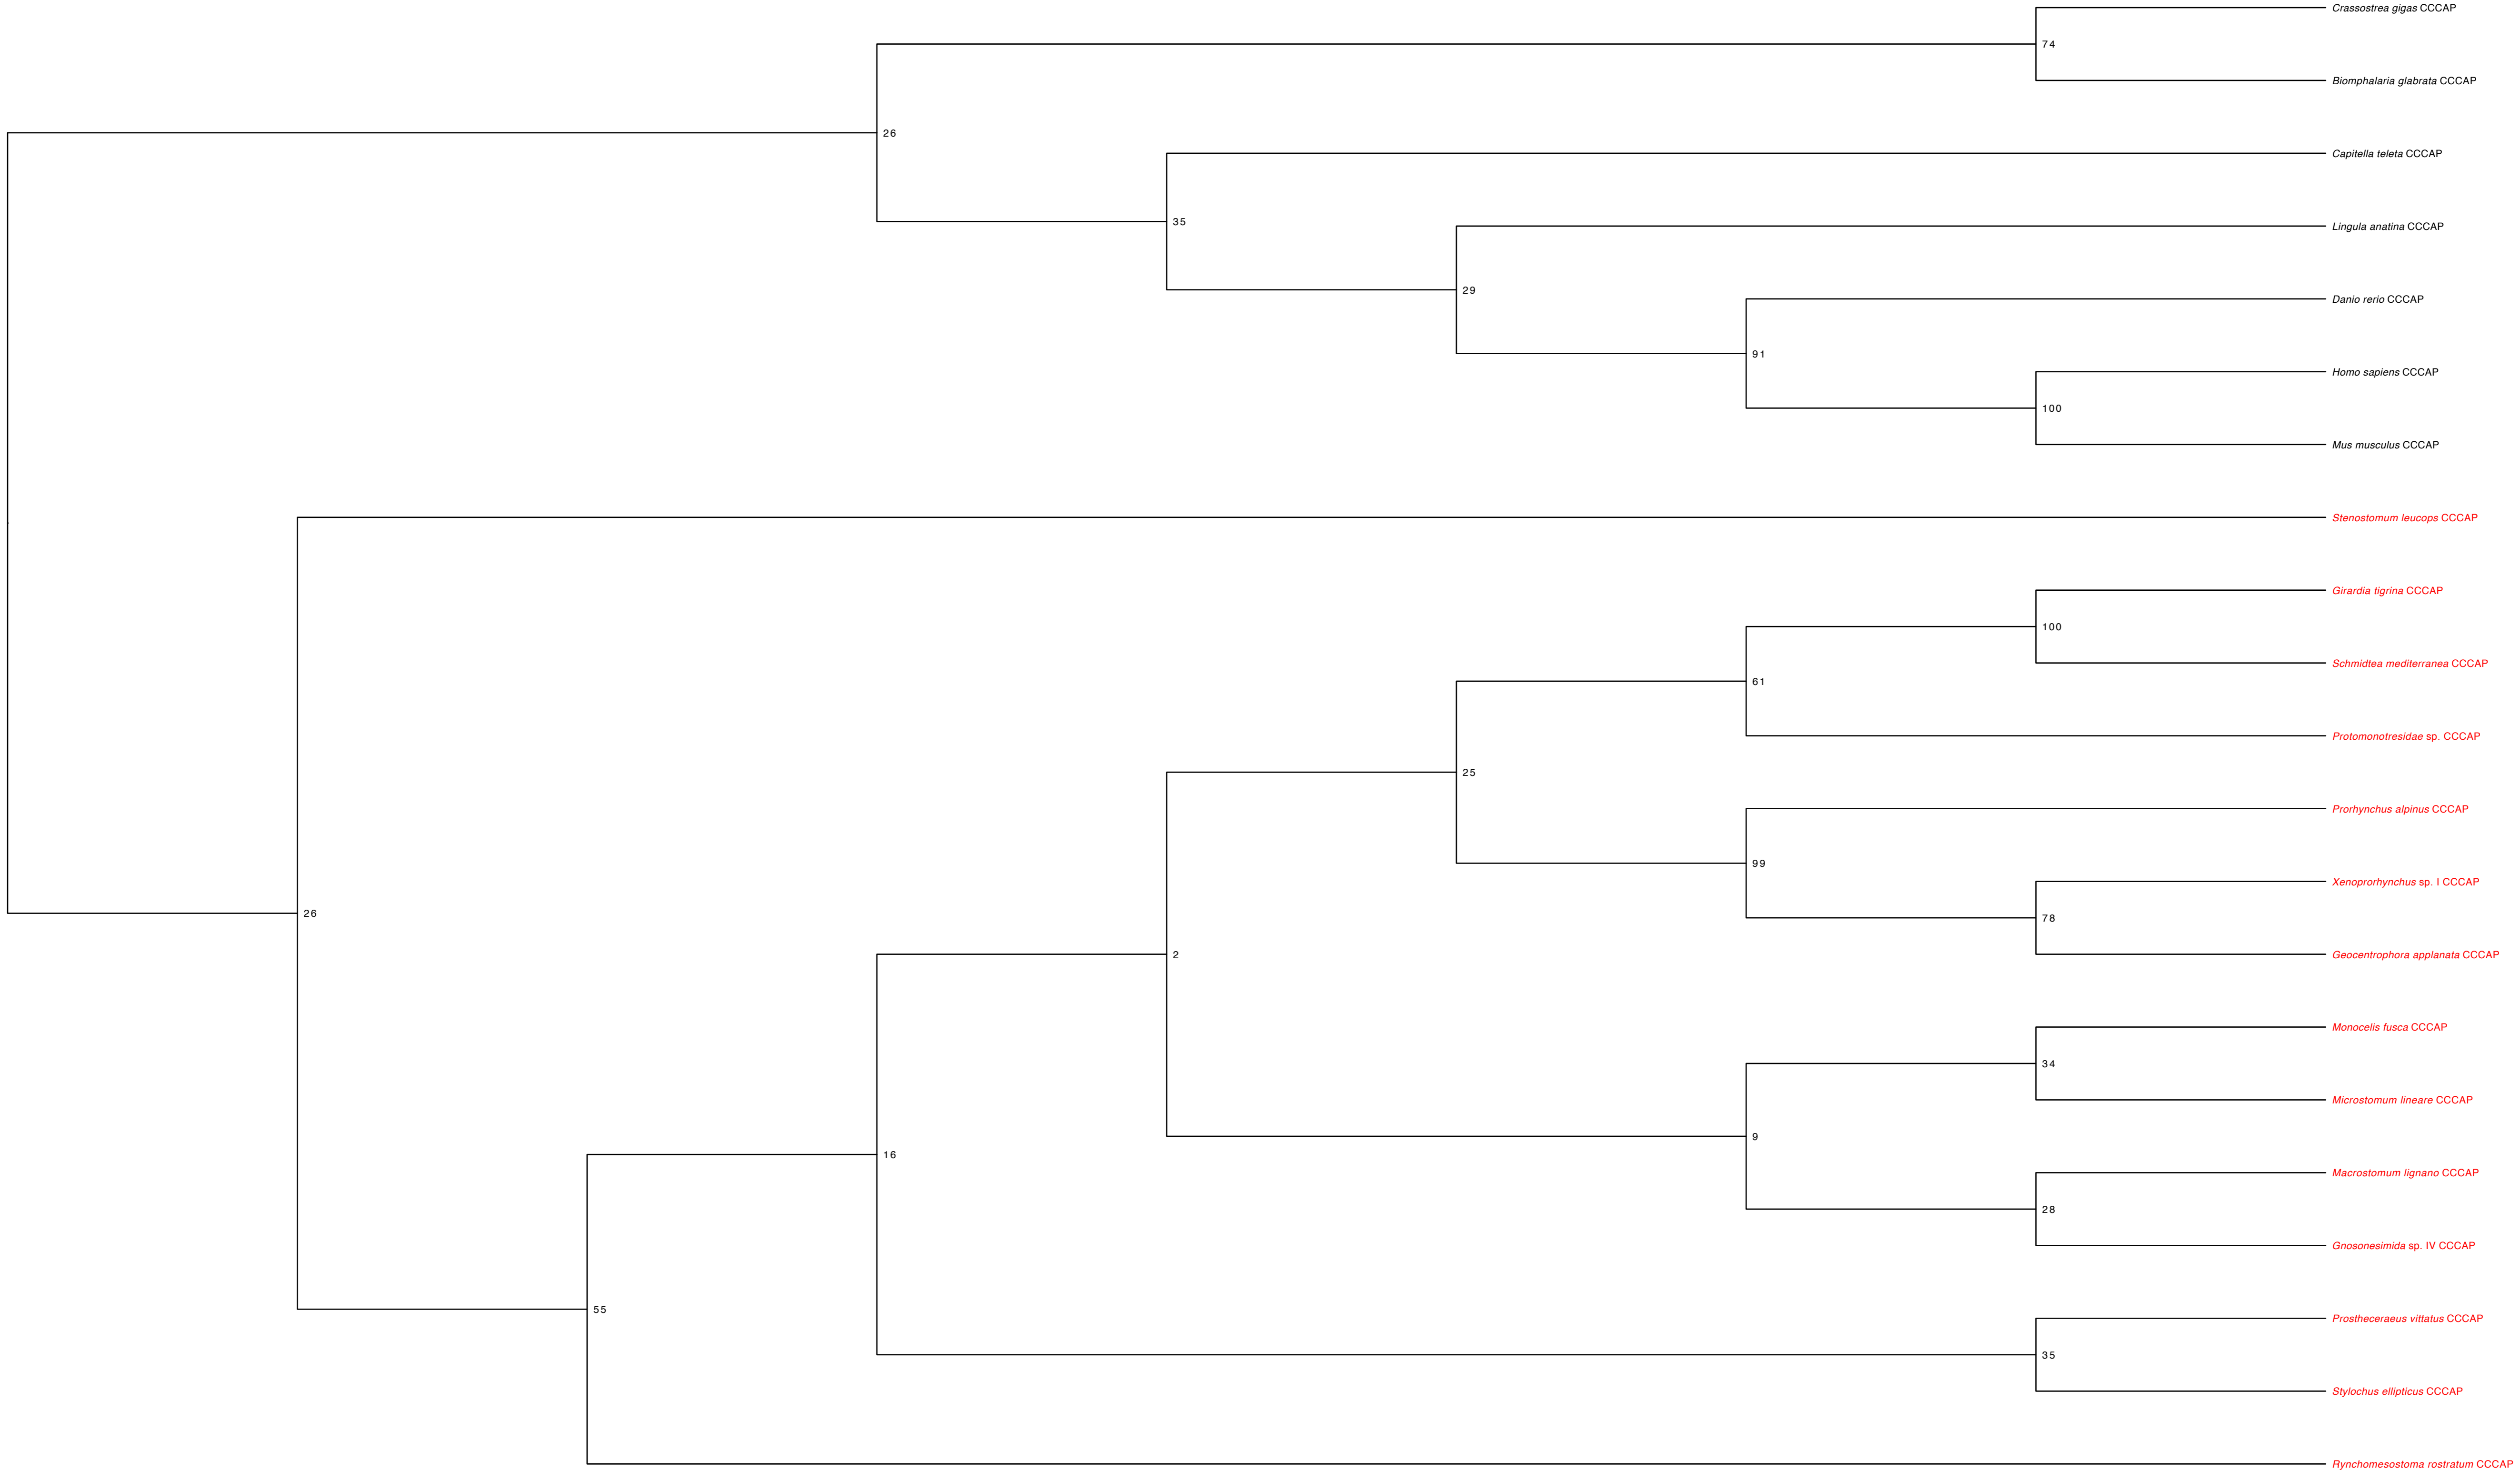

0.9



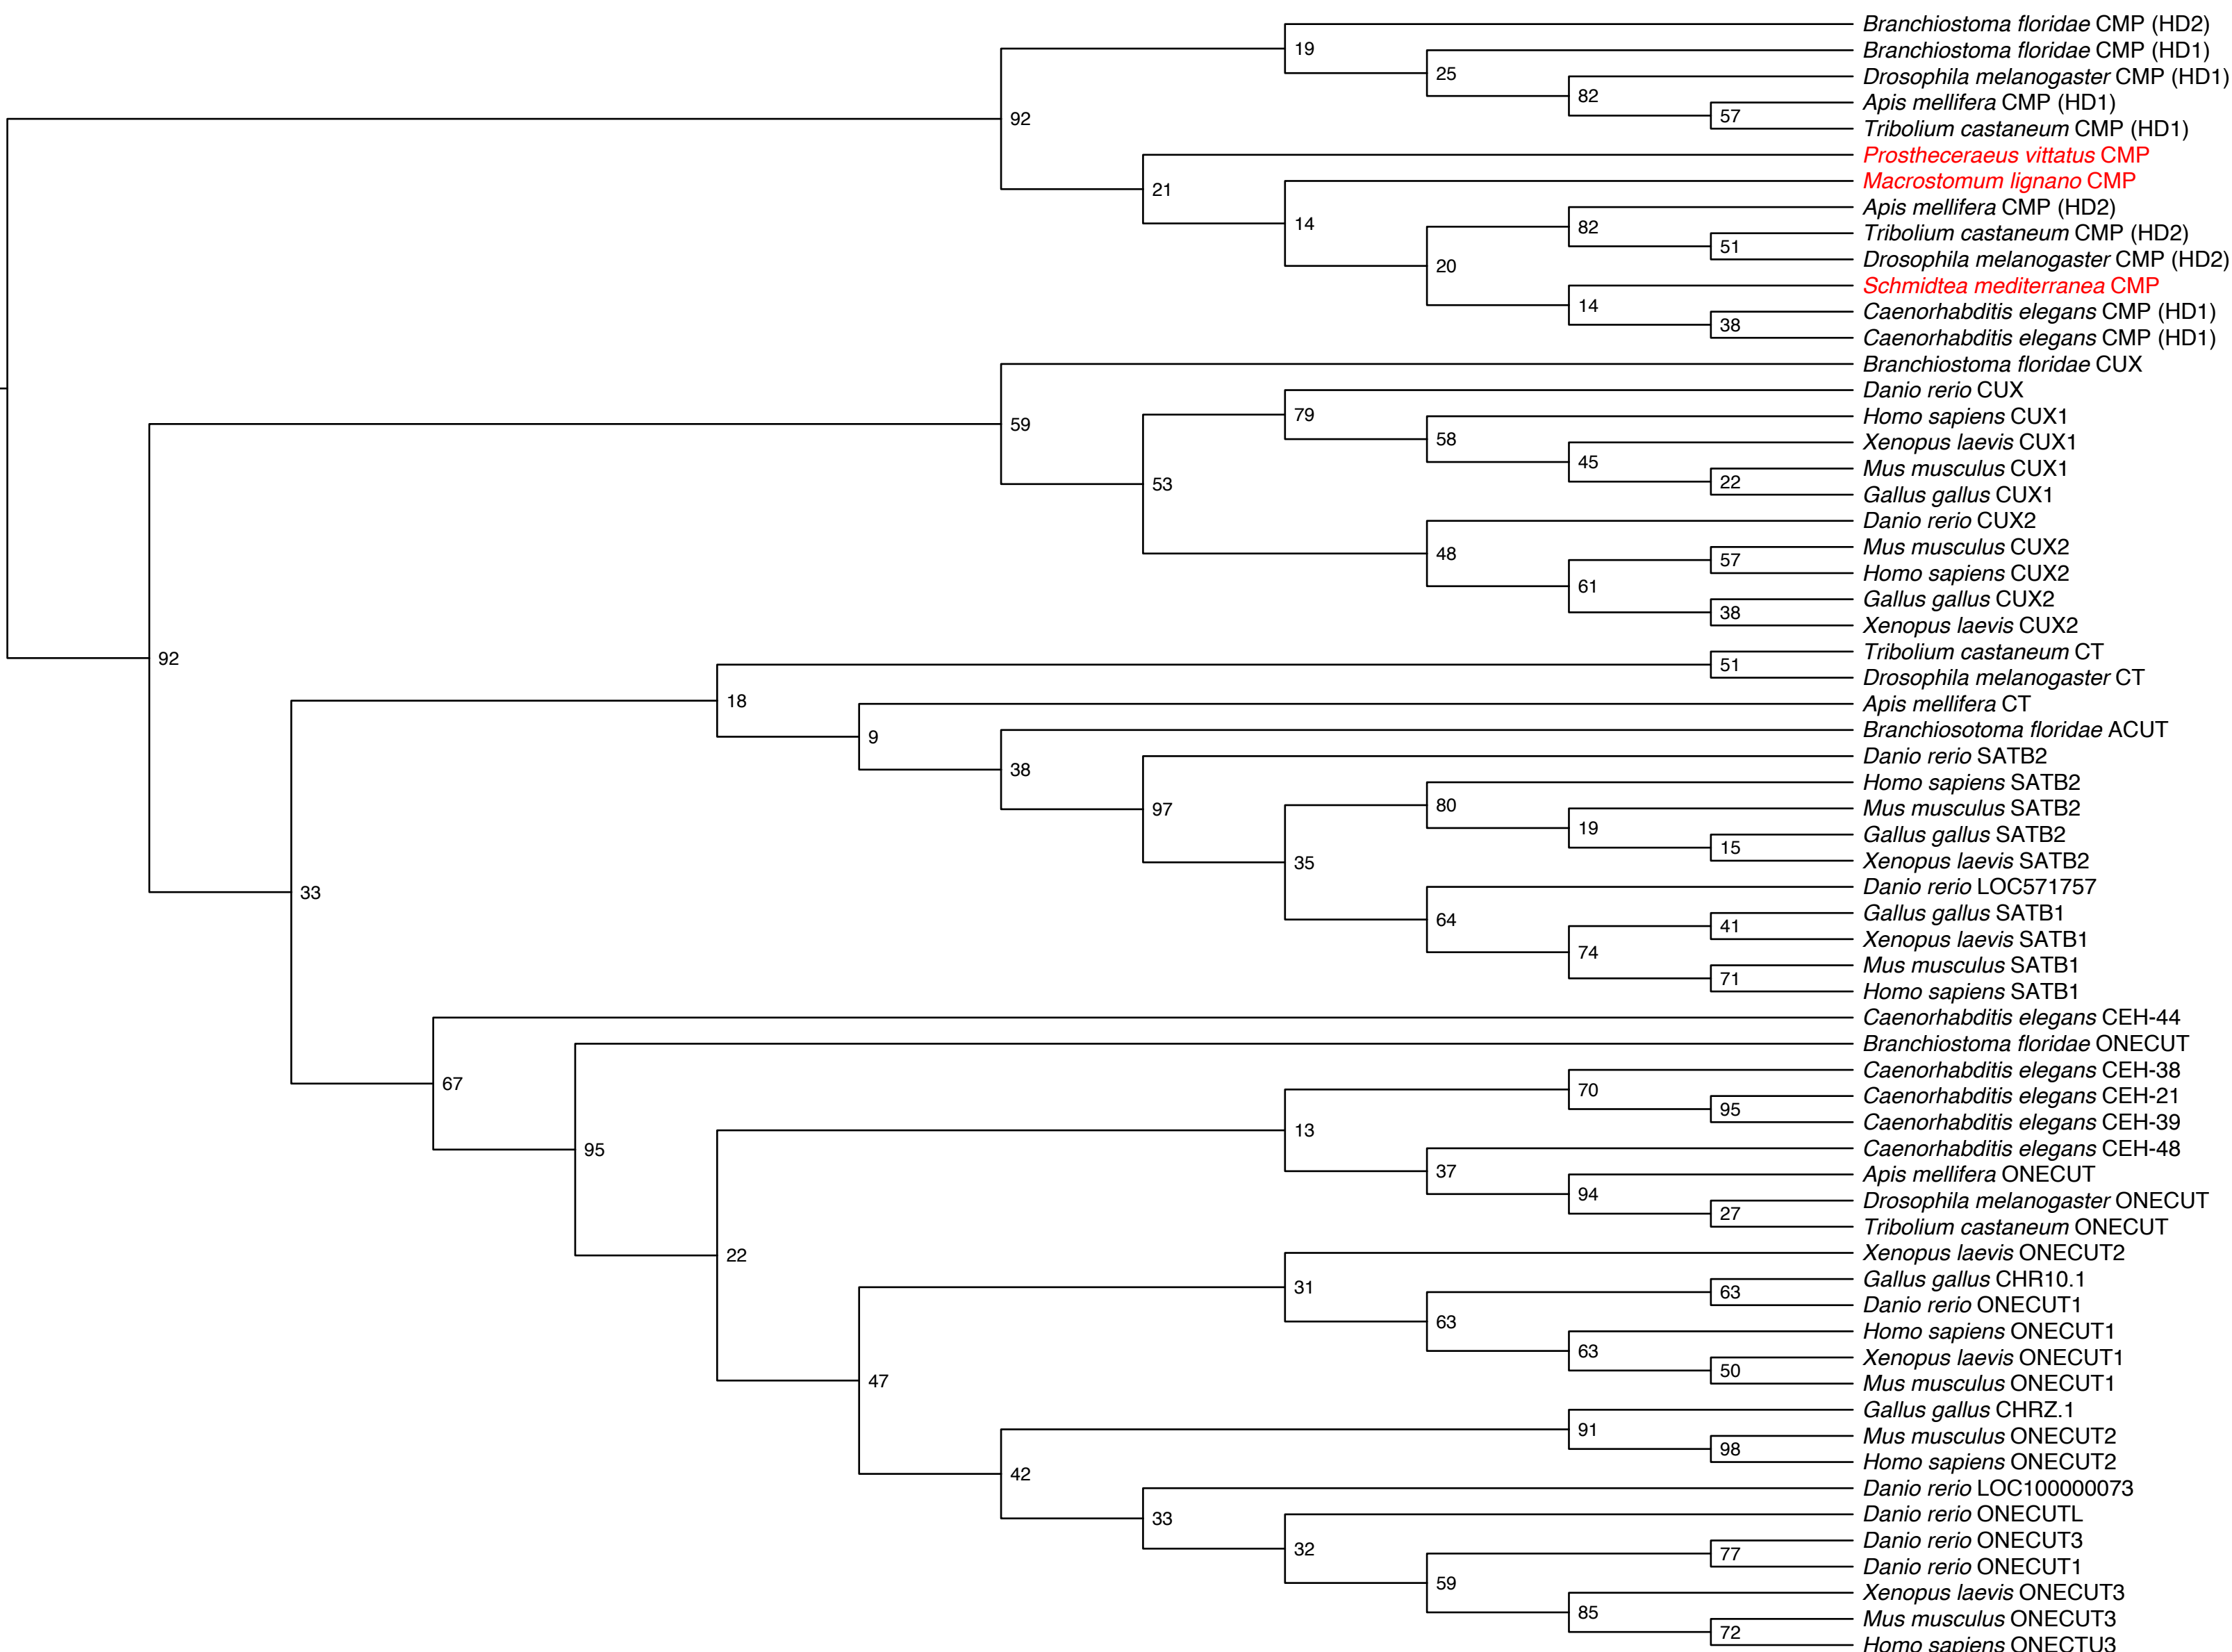

1.0

**Supplementary table 1. Transcriptomes analyzed in this study**

| <b>Species</b>               | <b>Group</b>    | <b>Source</b>            | <b>Depth (bp)</b> |
|------------------------------|-----------------|--------------------------|-------------------|
| <i>Austrognathia</i> sp.     | Gnathostomulida | Laumer, et al. (2015)    | 12,897,815        |
| <i>B. candida</i>            | Platyhelminthes | Laumer, et al. (2015)    | 22,365,603        |
| <i>B. balticus</i>           | Platyhelminthes | Laumer, et al. (2015)    | 11,257,706        |
| <i>B. semperi</i>            | Platyhelminthes | Laumer, et al. (2015)    | 56,081,914        |
| <i>D. lacteum</i>            | Platyhelminthes | Laumer, et al. (2015)    | 115,254,878       |
| <i>F. magna</i>              | Platyhelminthes | Laumer, et al. (2015)    | 33,048,065        |
| <i>G. applanata</i>          | Platyhelminthes | Laumer, et al. (2015)    | 84,830,526        |
| <i>G. tigrina</i>            | Platyhelminthes | Laumer, et al. (2015)    | 28,510,283        |
| <i>Gnosonesimida</i> sp. IV  | Platyhelminthes | Laumer, et al. (2015)    | 49,489,839        |
| <i>H. microstoma</i>         | Platyhelminthes | Tsai, et al. (2013)      | 14,805,351        |
| <i>K. amphipodicola</i>      | Platyhelminthes | Laumer, et al. (2015)    | 51,328,359        |
| <i>Lehardyia</i> sp.         | Platyhelminthes | Laumer, et al. (2015)    | 9,340,372         |
| <i>L. patella</i>            | Rotifera        | Laumer, et al. (2015)    | 1,846,131         |
| <i>L. squamata</i>           | Gastrotricha    | Laumer, et al. (2015)    | 61,247,222        |
| <i>M. ruebushi</i>           | Platyhelminthes | Laumer, et al. (2015)    | 32,818,396        |
| <i>M. lignano</i>            | Platyhelminthes | SRA (SRX1343824)         | 146,421,223       |
| <i>Microdalyellia</i> sp.    | Platyhelminthes | Laumer, et al. (2015)    | 15,908,586        |
| <i>M. lineare</i>            | Platyhelminthes | Laumer, et al. (2015)    | 104,592,789       |
| <i>M. fusca</i>              | Platyhelminthes | Laumer, et al. (2015)    | 107,319,077       |
| <i>P. alpinus</i>            | Platyhelminthes | Laumer, et al. (2015)    | 33,251,738        |
| <i>Prorhynchus</i> sp. I     | Platyhelminthes | Laumer, et al. (2015)    | 35,939,907        |
| <i>P. riseri</i>             | Platyhelminthes | Laumer, et al. (2015)    | 11,833,063        |
| <i>P. vittatus</i>           | Platyhelminthes | Laumer, et al. (2015)    | 361,770,473       |
| <i>Protomonotresidae</i> sp. | Platyhelminthes | Laumer, et al. (2015)    | 26,049,265        |
| <i>P. sphagnum</i>           | Platyhelminthes | Laumer, et al. (2015)    | 3,673,073         |
| <i>R. rostratum</i>          | Platyhelminthes | Laumer, et al. (2015)    | 54,514,686        |
| <i>S. mansoni</i>            | Platyhelminthes | Berriman, et al. (2009)  | 120,642,446       |
| <i>S. mediterranea</i>       | Platyhelminthes | Laumer, et al. (2015)    | 37,838,721        |
| <i>S. mediterranea</i> (BE)  | Platyhelminthes | Adamidi, et al. (2011)   | 26,258,087        |
| <i>S. mediterranea</i> (DD)  | Platyhelminthes | Brandl, et al. (2015)    | 51,791,386        |
| <i>S. mediterranea</i> (MU)  | Platyhelminthes | Sandmann, et al. (2011)  | 31,092,796        |
| <i>S. mediterranea</i> (OX)  | Platyhelminthes | Kao, et al. (2013)       | 59,986,795        |
| <i>S. mediterranea</i> (TO)  | Platyhelminthes | BioProject (PRJNA205281) | 30,446,539        |
| <i>Solenopharyngidae</i> sp. | Platyhelminthes | Laumer, et al. (2015)    | 15,247,204        |
| <i>S. leucops</i>            | Platyhelminthes | Laumer, et al. (2015)    | 79,082,476        |
| <i>S. ellipticus</i>         | Platyhelminthes | Laumer, et al. (2015)    | 129,598,829       |
| <i>Xenoprorhynchus</i> sp. I | Platyhelminthes | Laumer, et al. (2015)    | 20,991,891        |
